# Supplementary material for: Male long-distance migrant turned sedentary; The West European pond bat (Myotis dasycneme) alters their migration and hibernation behaviour
Source: PLoS One. 2019 Oct 28;14(10):e0217810. doi: 10.1371/journal.pone.0217810 (PMC6816563; doi:10.1371/journal.pone.0217810)
Supplement: S3 Table — (XLSX) [file pone.0217810.s006.xlsx]

## Sheet: S6 table
RINGNUMM	Sex	age	capture date	capture location	x coordinate	y coordinate	recapture date	recapture location	x coordinate	y coordinate
E421003	female	ad	2003-06-03	rotonde brug	109676	451872	2012-02-13	gasthuisdellen	182290	317795
E421006	female	ad	2003-06-04	afslag dubbele wiericke	115430	454499	2005-01-02	schenk	181680	320395
E421032	female	ad	2003-06-14	brug kolonie W'veen	105455	448651	2006-01-02	sibbe	186340	318230
E421071	female	ad	2003-06-23	grote brug L' vaart	107900	466800	2003-09-03	U8	81365	458640
E421073	female	ad	2003-06-23	grote brug L' vaart	107900	466800	2008-12-22	U8	81365	458640
E421079	female	ad	2003-06-27	weegje	105373	447603	2004-07-25	la croixberg	172234	311704
E421098	female	ad	2003-07-05	karwei	106763	446485	2005-01-05	gasthuisdellen	182290	317795
E421105	female	ad	2003-07-09	kollenbrug	119200	463000	2004-02-19	achim lichter	324700	244700
E421124	female	ad	2003-07-12	grote brug L' vaart	107900	466800	2007-01-03	Wervershoofd	180510	316210
E421130	female	ad	2003-07-12	grote brug L' vaart	107900	466800	2003-10-01	U6	81284	458549
E421173	female	sub	2003-07-31	karwei	106763	446485	2005-01-31	St omer, la coupole	-210000	160000
E421196	female	sub	2003-08-15	w'naar wetering 1	88600	463400	2004-03-11	wassenaar	83967	464265
E421200	female	sub	2003-08-16	oude tol	93600	466900	2004-01-12	valkenburg	87300	464700
E421213	female	ad	2004-04-09	karwei	106763	446485	2012-11-09	schenk	181680	320395
E421214	female	ad	2004-04-09	karwei	106763	446485	2013-03-03	ternaaien beneden	171050	311300
E421217	female	ad	2004-04-09	karwei	106763	446485	2007-01-05	gasthuisdellen	182290	317795
E421255	female	ad	2004-05-10	A16 oud-R' vaart	109283	452032	2004-09-04	munsterput (Dld)	291949	443415
E421285	female	sub	2004-05-21	karwei	106763	446485	2012-12-27	roothergroeve	182450	316760
E421329	female	ad	2004-06-05	opgang brug L' vaart	109200	465600	2007-03-07	U5	81240	458647
E421338	female	sub	2004-06-05	opgang brug L' vaart	109200	465600	2006-01-19	moffenslag	83028	463065
E421356	female	sub	2004-06-15	oosthuizen	128549	509802	2006-01-22	ruighoek	80659	460201
E421377	female	ad	2004-06-26	A16 oud-R' vaart	109283	452032	2006-01-06	ravengroeve	181950	320340
E421378	female	sub	2004-06-26	A16 oud-R' vaart	109283	452032	2007-01-06	ravengroeve	181950	320340
E421379	female	ad	2002-08-28	hsb	92500	456600	2004-04-11	wassenaar	83967	464265
E421409	female	sub	2004-07-13	treinweg	108300	460500	2005-01-03	koepelgroeve	186045	319264
E421411	female	ad	2003-07-12	middelste brug L' vaart	108800	466000	2006-12-27	pitjesberg	171725	311298
E421419	female	sub	2004-07-16	nieuwe weteringbrug	102600	469900	2010-01-27	ruighoek	80659	460201
E421429	female	sub	2004-07-19	woerden (naast cofee)	118960	455499	2008-01-02	duin en kruitberg	98700	494200
E421449	female	sub	2004-07-26	karwei	106763	446485	2006-03-31	schenk	181680	320395
E421450	female	ad	2004-07-26	karwei	106763	446485	2005-01-02	flessenberg	186260	317657
E421486	female	sub	2005-05-07	hsb	92500	456600	2006-03-29	coelenbosch	182320	318125
E421523	female	ad	2005-06-20	kattebrug	110700	467600	2010-09-22	wassenaar	83967	464265
E421552	female	ad	2004-07-29	meerb'wetering	95200	461700	2007-10-28	U8	81365	458640
E421562	female	sub	2004-08-09	brug bij cafe	92400	456800	2009-01-18	Krähenloch	243052	288975
E421599	female	ad	2002-08-19	hsb	92500	456600	2007-03-07	wassenaar	83967	464265
E421600	female	sub	2005-04-11	hsb	92500	456600	2008-03-26	U3	81249	458613
E421629	female	sub	2005-06-05	tjalleberd_deelen oost	192250	559900	2014-02-23	Porta Westfalica	345000	464000
E421630	female	ad	2005-06-05	tjalleberd_deelen oost	192250	559900	2010-01-30	ochtrup	278198	470312
E426533	female	ad	2005-07-19	balk	167800	545550	2008-10-21	moffenslag	83028	463065
E426546	female	ad	2005-07-23	lemmer	174950	540400	2006-03-24	ruighoek	80659	460201
E426593	female	ad	2006-04-14	hsb	92500	456600	2007-03-07	ruighoek	80659	460201
E426699	female	ad	2007-04-18	middelste brug L' vaart	108800	466000	2008-01-01	blankenheim	243874	272759
E426710	female	ad	2007-05-04	hsb	92500	456600	2014-01-04	Koegat	170800	311100
E426725	female	ad	2007-06-21	breevaart middenbrug	109321	450619	2014-01-17	Biez
E428601	female	sub	2007-08-18	Vrouwenakker	113800	471400	2010-09-05	munsterput (Dld)	291949	443415
E428602	female	sub	2007-08-18	Vrouwenakker	113800	471400	2008-01-22	eifel, nuttlar	324800	244800
E428664	female	sub	2007-08-04	Vrouwenakker	113800	471400	2007-11-22	ruighoek	80659	460201
E428675	female	sub	2007-08-06	breevaart middenbrug	109321	450619	2008-09-20	Koegat	170800	311100
E428682	female	ad	2007-08-06	breevaart middenbrug	109321	450619	2015-04-15	rochefort
E428691	female	sub	2007-08-17	brug bij cafe	92400	456800	2010-01-22	moffenslag	83028	463065
E433721	female	ad	2008-06-12	halfweg	111700	488800	2010-01-16	Nora 4	92347	478590
E433734	female	ad	2008-06-16	heinoonvaart	119400	463400	2011-02-15	U5	81240	458647
E433745	female	sub	2008-07-16	karwei	106763	446485	2011-01-13	U3	81249	458613
E433916	female	sub	2008-08-28	brug kolonie W'veen	105455	448651	2011-01-03	catacomben	185580	319590
T152	female	ad	2003-07-12	middelste brug L' vaart	108800	466000	2009-04-03	moffenslag	83028	463065
T466	female	sub	2011-07-14	brug kolonie W'veen	105455	448651	2011-09-01	Koegat	170800	311100
T494	female	ad	2011-06-11	raamsdonk	122750	411105	2011-09-02	la croixberg	172234	311704
X71371	female	ad	2002-06-30	hsb	92500	456600	2003-02-15	krahenloch	243052	288975
X71379	female	ad	2002-08-28	hsb	92500	456600	2003-01-14	U8	81365	458640
X71399	female	ad	2003-04-20	zwammerdambrug	110100	457800	2008-03-26	U5	81240	458647
X71415	female	ad	2003-04-23	treinweg	108300	460500	2005-03-27	wassenaar	83967	464265
X71422	female	ad	2003-04-29	treinweg	108300	460500	2005-01-03	scharneberg	180530	316345
X71443	female	ad	2003-05-03	aerlanderveen	110100	461500	2003-12-13	robin thiere te heyoul	172000	311400
X71450	female	ad	2003-05-03	aerlanderveen	110100	461500	2008-11-13	moffenslag	83028	463065
X75556	female	ad	2003-05-09	zegersloot	107100	460800	2004-02-19	eifel	325000	245000
X75558	female	ad	2003-05-09	zegersloot	107100	460800	2011-01-03	schenk	181680	320395
X75567	female	ad	2003-05-25	otwegwetering	105100	455500	2003-12-22	cluisberg	182020	318020
X75576	female	ad	2003-05-30	breevaart middenbrug	109321	450619	2011-10-29	roothergroeve	182450	316760
X75595	female	ad	2003-05-31	A16 oud-R' vaart	109283	452032	2006-01-04	groeve onder de ruine	186220	319150
X79077	female	ad	2002-09-19	viadukt A4 groot	91400	458700	2003-03-29	ruighoek	80659	460201
X79083	female	ad	2002-09-20	U1	81221	458517	2003-07-11	aerlanderveen zuideinde	110040	461614
X79095	female	ad	2003-04-17	brug kolonie W'veen	105455	448651	2003-08-15	mettenberg	181810	317160
X80081	female	sub	2002-08-19	hsb	92500	456600	2008-12-23	ruighoek	80659	460201
X80082	female	ad	2002-08-19	hsb	92500	456600	2003-04-12	ruighoek	80659	460201
X80100	female	sub	2002-09-06	brug kolonie W'veen	105455	448651	2006-03-31	ravengroeve	181950	320340
E421029	male	ad	2003-06-09	heinoonvaart	119400	463400	2008-03-27	wassenaar	83967	464265
E421131	male	sub	2003-07-12	grote brug L' vaart	107900	466800	2010-04-19	munsterput (Dld)	291949	443415
E421136	male	sub	2003-07-12	grote brug L' vaart	107900	466800	2007-02-19	blankenheim	243874	272759
E421152	male	ad	2003-07-29	hsb	92500	456600	2011-12-21	ruighoek	80659	460201
E421154	male	sub	2003-07-29	hsb	92500	456600	2007-02-12	wassenaar	83967	464265
E421156	male	sub	2003-07-29	hsb	92500	456600	2004-08-15	ruighoek	80659	460201
E421157	male	ad	2003-07-29	hsb	92500	456600	2005-02-16	ruighoek	80659	460201
E421159	male	ad	2003-07-29	hsb	92500	456600	2010-03-09	wassenaar	83967	464265
E421160	male	sub	2003-07-29	hsb	92500	456600	2003-09-03	U8	81365	458640
E421161	male	sub	2003-07-29	hsb	92500	456600	2004-09-30	ruighoek	80659	460201
E421163	male	ad	2003-07-30	afslag oude rijn	90400	464300	2004-01-20	ruighoek	80659	460201
E421164	male	ad	2003-07-30	afslag oude rijn	90400	464300	2010-12-21	ruighoek	80659	460201
E421178	male	sub	2003-07-31	karwei	106763	446485	2005-01-03	Fluwelengrot	186210	319100
E421186	male	sub	2003-08-05	afslag oude rijn	90400	464300	2003-10-22	wassenaar	83967	464265
E421193	male	sub	2003-08-07	kollenbrug	119200	463000	2014-02-01	Troula lou	174669	312076
E421199	male	ad	2002-09-03	ruighoek	80659	460201	2003-08-16	oude tol	93600	466900
E421201	male	ad	2003-08-16	oude tol	93600	466900	2008-03-26	U5	81240	458647
E421202	male	ad	2003-08-16	oude tol	93600	466900	2004-12-20	ruighoek	80659	460201
E421203	male	ad	2003-08-16	oude tol	93600	466900	2003-12-29	duin en kruitberg	98700	494200
E421231	male	ad	2004-04-16	U3	81249	458613	2004-07-12	hsb	92500	456600
E421232	male	ad	2004-04-16	ruighoek	80659	460201	2007-05-26	brug bij cafe	92400	456800
E421233	male	sub	2003-07-22	dwars oost	97600	463900	2008-11-13	ruighoek	80659	460201
E421236	male	ad	2004-04-16	ruighoek	80659	460201	2004-07-04	opgang brug L' vaart	109200	465600
E421241	male	ad	2004-04-19	w'naar wetering 1	88600	463400	2011-02-15	ruighoek	80659	460201
E421242	male	sub	2004-04-19	w'naar wetering 1	88600	463400	2012-01-20	U8	81365	458640
E421246	male	sub	2004-04-20	hsb	92500	456600	2006-01-22	ruighoek	80659	460201
E421247	male	ad	2002-05-23	viadukt A4 groot	91400	458700	2006-01-22	ruighoek	80659	460201
E421248	male	sub	2004-04-20	hsb	92500	456600	2004-12-06	ruighoek	80659	460201
E421259	male	sub	2004-05-13	grote brug L' vaart	107900	466800	2009-01-21	ruighoek	80659	460201
E421301	male	ad	2004-05-28	w'naar wetering 1	88600	463400	2007-03-26	wassenaar	83967	464265
E421305	male	sub	2004-06-01	hsb	92500	456600	2012-01-20	U5	81240	458647
E421306	male	sub	2004-06-01	hsb	92500	456600	2004-11-15	ruighoek	80659	460201
E421307	male	sub	2004-06-01	hsb	92500	456600	2011-04-04	U1	81221	458517
E421400	male	sub	2004-07-05	heinoonvaart	119400	463400	2007-03-01	la croixberg	172234	311704
E421401	male	ad	2003-07-28	uilenbossch onb	81000	458000	2004-07-06	A44 zuid	93200	468600
E421402	male	sub	2004-07-12	hsb	92500	456600	2012-11-04	ruighoek	80659	460201
E421414	male	ad	2002-09-12	U8	81365	458640	2005-08-04	opgang brug L' vaart	109200	465600
E421417	male	sub	2004-07-16	nieuwe weteringbrug	102600	469900	2005-01-05	wijngaardsberg	180000	314500
E421478	male	ad	2002-05-09	hsb	92500	456600	2006-04-09	ruighoek	80659	460201
E421479	male	sub	2005-05-07	hsb	92500	456600	2012-03-23	ruighoek	80659	460201
E421480	male	sub	2005-05-07	hsb	92500	456600	2005-12-21	ruighoek	80659	460201
E421482	male	ad	2005-05-07	hsb	92500	456600	2006-01-01	gemeentegrot	186080	319280
E421538	male	ad	2002-09-09	hsb	92500	456600	2004-09-04	ruighoek	80659	460201
E421539	male	ad	2005-06-30	hsb	92500	456600	2008-01-19	tennisbunker	82463	458096
E421549	male	ad	2005-07-03	drachten	199300	568400	2014-02-14	tunnel osna	345135	464966
E421560	male	sub	2004-08-09	brug bij cafe	92400	456800	2004-11-15	ruighoek	80659	460201
E421566	male	sub	2004-09-19	brug bij cafe	92400	456800	2006-01-15	zonneberg	176455	315318
E421568	male	ad	2004-09-19	brug bij cafe	92400	456800	2005-09-11	wassenaar	83967	464265
E421597	male	ad	2002-06-06	hgb	94300	457300	2005-03-10	ruighoek	80659	460201
E421598	male	ad	2002-09-09	hsb	92500	456600	2008-12-23	ruighoek	80659	460201
E421611	male	sub	2005-05-31	hsb	92500	456600	2007-02-14	U6	81284	458549
E421612	male	ad	2005-05-31	hsb	92500	456600	2006-03-24	moffenslag	83028	463065
E426540	male	sub	2005-07-22	bakhuizen	158550	543200	2006-01-07	vallenberg	186590	318010
E426552	male	ad	2002-06-06	hgb	94300	457300	2007-01-17	ruighoek	80659	460201
E426553	male	ad	2002-06-22	hsb	92500	456600	2004-04-01	wassenaar	83967	464265
E426558	male	sub	2005-08-11	karwei	106763	446485	2009-02-20	keel	173730	314510
E426594	male	ad	2006-04-14	hsb	92500	456600	2010-12-23	wassenaar	83967	464265
E426601	male	sub	2006-05-11	brug bij cafe	92400	456800	2008-09-18	ruighoek	80659	460201
E426602	male	ad	2002-09-09	hsb	92500	456600	2003-12-09	U8	81365	458640
E426603	male	ad	2006-05-11	brug bij cafe	92400	456800	2010-12-21	ruighoek	80659	460201
E426606	male	sub	2006-05-11	brug bij cafe	92400	456800	2006-09-10	U3	81249	458613
E426607	male	ad	2002-07-09	hsb	92500	456600	2008-09-18	U8	81365	458640
E426647	male	sub	2006-07-20	karwei	106763	446485	2009-01-10	ternaaien beneden	171050	311300
E426656	male	sub	2006-07-27	brug bij cafe	92400	456800	2011-12-21	ruighoek	80659	460201
E426657	male	ad	2006-07-27	brug bij cafe	92400	456800	2008-03-13	ruighoek	80659	460201
E426658	male	ad	2006-07-27	brug bij cafe	92400	456800	2007-03-07	moffenslag	83028	463065
E426662	male	ad	2006-08-08	brug bij cafe	92400	456800	2006-12-20	ruighoek	80659	460201
E426665	male	ad	2006-08-08	brug bij cafe	92400	456800	2006-09-10	ruighoek	80659	460201
E426677	male	sub	2006-08-22	brug bij cafe	92400	456800	2007-03-26	ruighoek	80659	460201
E426714	male	ad	2007-05-26	brug bij cafe	92400	456800	2011-01-15	ruighoek	80659	460201
E426716	male	sub	2007-05-26	brug bij cafe	92400	456800	2012-01-20	U8	81365	458640
E426718	male	sub	2007-05-26	brug bij cafe	92400	456800	2010-12-21	U5	81240	458647
E426722	male	ad	2007-06-20	brug bij cafe	92400	456800	2011-01-21	moffenslag	83028	463065
E426732	male	sub	2007-07-12	brug kolonie W'veen	105455	448651	2008-01-19	clingendael badhuis	85100	454900
E426742	male	sub	2007-08-03	brug bij cafe	92400	456800	2010-03-23	U8	81365	458640
E426745	male	sub	2007-08-03	brug bij cafe	92400	456800	2007-11-22	U8	81365	458640
E426746	male	sub	2007-08-03	brug bij cafe	92400	456800	2008-01-23	wassenaar	83967	464265
E426747	male	sub	2007-08-03	brug bij cafe	92400	456800	2009-04-13	ruighoek	80659	460201
E426748	male	sub	2007-08-03	brug bij cafe	92400	456800	2007-12-18	ruighoek	80659	460201
E428666	male	sub	2007-08-04	Uithoorn	117000	471700	2007-10-28	ruighoek	80659	460201
E428692	male	sub	2007-08-17	brug bij cafe	92400	456800	2008-01-21	moffenslag	83028	463065
E433701	male	sub	2008-05-08	hsb	92500	456600	2011-02-11	pitjesberg	171725	311298
E433704	male	sub	2008-05-08	hsb	92500	456600	2009-04-03	moffenslag	83028	463065
E433705	male	ad	2008-05-08	hsb	92500	456600	2010-12-21	ruighoek	80659	460201
E433727	male	sub	2008-06-13	o'kerk a/d amstel	122850	478700	2012-02-13	munsterput (Dld)	291949	443415
E433918	male	sub	2008-08-28	brug kolonie W'veen	105455	448651	2009-01-18	Krähenloch	243052	288975
E433959	male	sub	2013-06-17	halfweg	111700	488800	2014-12-30	duin en kruitberg	98700	494200
E433975	male	ad	2011-08-20	Grootslagpolder	144102	525900	2013-04-12	munsterput (Dld)	291949	443415
T002	male	ad	2002-05-09	hsb	92500	456600	2004-09-30	wassenaar	83967	464265
T181	male	sub	2003-07-27	A44 zuid	93200	468600	2003-11-02	wassenaar	83967	464265
T400	male	sub	2009-06-25	grote brug L' vaart	107900	466800	2010-10-19	munsterput (Dld)	291949	443415
T416	male	sub	2009-07-10	Vrouwenakker	113800	471400	2012-03-13	munsterput (Dld)	291949	443415
T516	male	ad	2009-08-27	hsb	92500	456600	2012-03-23	ruighoek	80659	460201
X71361	male	ad	2002-06-18	viadukt A4 groot	91400	458700	2002-11-17	ruighoek	80659	460201
X71362	male	ad	2002-06-22	hsb	92500	456600	2002-12-28	kasteelgroeve	174435	314150
X71363	male	ad	2002-06-22	hsb	92500	456600	2003-03-26	ruighoek	80659	460201
X71366	male	ad	2002-06-30	hsb	92500	456600	2006-01-16	toog cling	82796	457912
X71367	male	ad	2002-06-30	hsb	92500	456600	2004-04-01	moffenslag	83028	463065
X71370	male	sub	2002-06-30	hsb	92500	456600	2006-01-14	steendorp (fort)	85500	362000
X71375	male	ad	2002-07-09	hsb	92500	456600	2004-04-14	ruighoek	80659	460201
X71376	male	ad	2002-07-09	hsb	92500	456600	2004-12-20	ruighoek	80659	460201
X71377	male	ad	2002-08-28	hsb	92500	456600	2003-03-16	U10	81336	458633
X71383	male	ad	2002-08-28	hsb	92500	456600	2004-01-10	clingendael	85060	454700
X71385	male	sub	2003-04-15	A44 zandsloot	95600	470200	2003-11-15	ruighoek	80659	460201
X71498	male	ad	2002-06-06	hgb	94300	457300	2007-03-07	ruighoek	80659	460201
X71499	male	ad	2002-06-06	hgb	94300	457300	2004-04-16	U8	81365	458640
X75562	male	ad	2003-05-11	poel in sassam	96500	471200	2004-01-20	wassenaar	83967	464265
X75563	male	ad	2003-05-11	poel in sassam	96500	471200	2008-04-06	ruighoek	80659	460201
X75564	male	ad	2003-05-11	poel in sassam	96500	471200	2003-09-12	U8	81365	458640
X75566	male	ad	2003-05-18	A44 noord	93200	468700	2011-12-21	wassenaar	83967	464265
X79051	male	ad	2002-06-28	r'dam rottemeer	98250	449500	2003-09-03	U8	81365	458640
X79059	male	sub	2002-09-09	hsb	92500	456600	2004-11-15	ruighoek	80659	460201
X79063	male	sub	2002-09-09	hsb	92500	456600	2012-01-26	ruighoek	80659	460201
X79068	male	ad	2002-09-09	hsb	92500	456600	2004-12-20	ruighoek	80659	460201
X79074	male	ad	2002-09-12	U8	81365	458640	2004-05-29	dwars oost	97600	463900
X79574	male	ad	2002-08-23	U6	81284	458549	2004-06-01	hsb	92500	456600
X79577	male	ad	2002-08-26	U1	81221	458517	2003-07-12	grote brug L' vaart	107900	466800
X79586	male	ad	2002-09-03	ruighoek	80659	460201	2004-07-28	hsb	92500	456600
